# Supplementary material for: Quantitative analysis of ACE2 binding to coronavirus spike proteins: SARS-CoV-2 vs. SARS-CoV and RaTG13
Source: Royal Society of Chemistry journal article supplement (doi:10.1039/d1cp01075a), 2021-01-01
Supplement: d1cp01075a1.pdf [file d1cp01075a1.pdf]

## Support Information

### Quantitative analysis of ACE2 bindings to coronavirus spike proteins : SARS-CoV-2 vs SARS-CoV and RaTG13

Zhendong Li<sup>1</sup> and John Z.H., Zhang<sup>1,2,3,4\*</sup>

<sup>1</sup>*Shanghai Engineering Research Center of Molecular Therapeutics and New Drug Development, Shanghai Key Laboratory of Green Chemistry & Chemical Process, School of Chemistry and Molecular Engineering,*

*East China Normal University at Shanghai, 200062, China*

<sup>2</sup>*NYU-ECNU Center for Computational Chemistry at NYU Shanghai,*

*Shanghai 200062, China*

<sup>3</sup>*Department of Chemistry, New York University, NY, NY10003, USA*

<sup>4</sup>*Collaborative Innovation Center of Extreme Optics, Shanxi University, Taiyuan, Shanxi 030006, China*

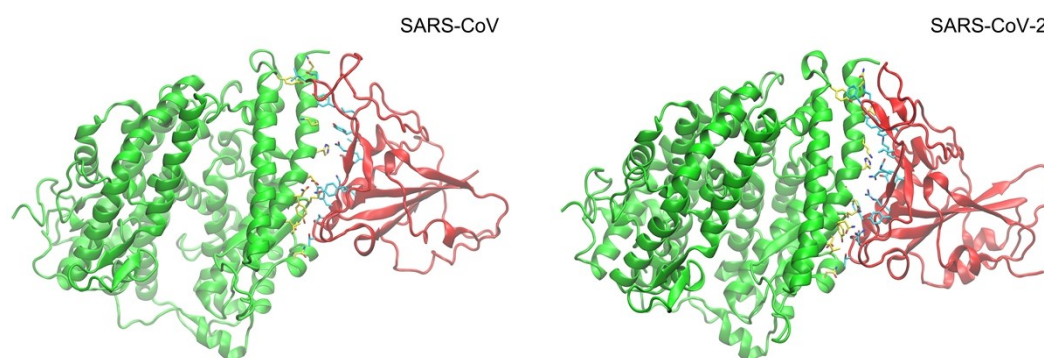

**Figure S1.** Comparisons of crystal structures for SARS-CoV RBD and SARS-CoV-2 RBD complex systems. The RBDs are in red and the ACE2 are in green. The side chains of hotspot residues from our calculation are shown as sticks.

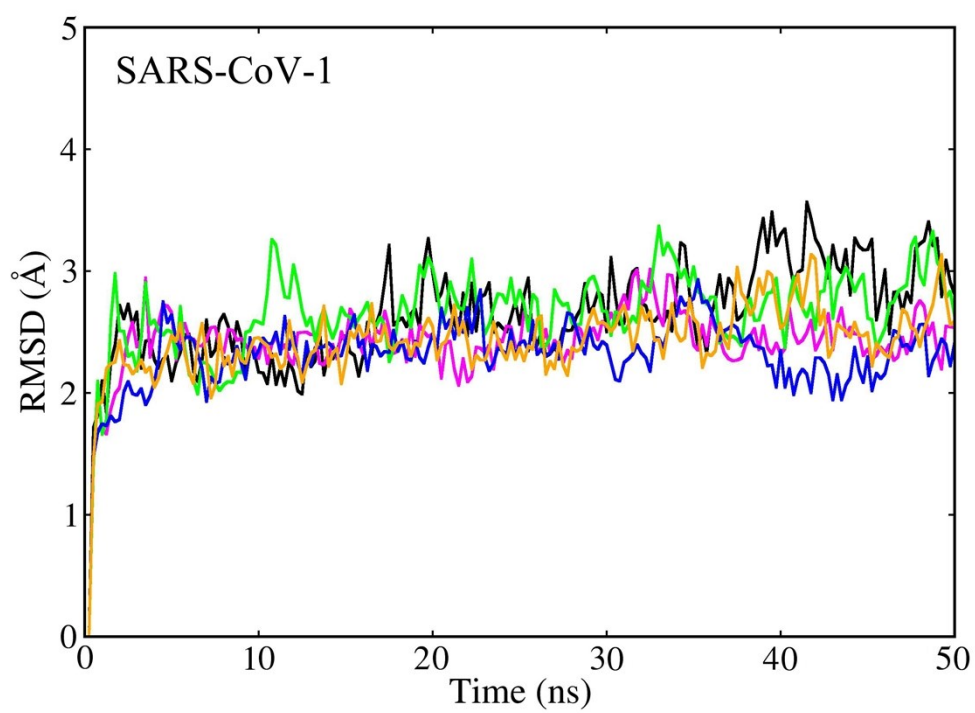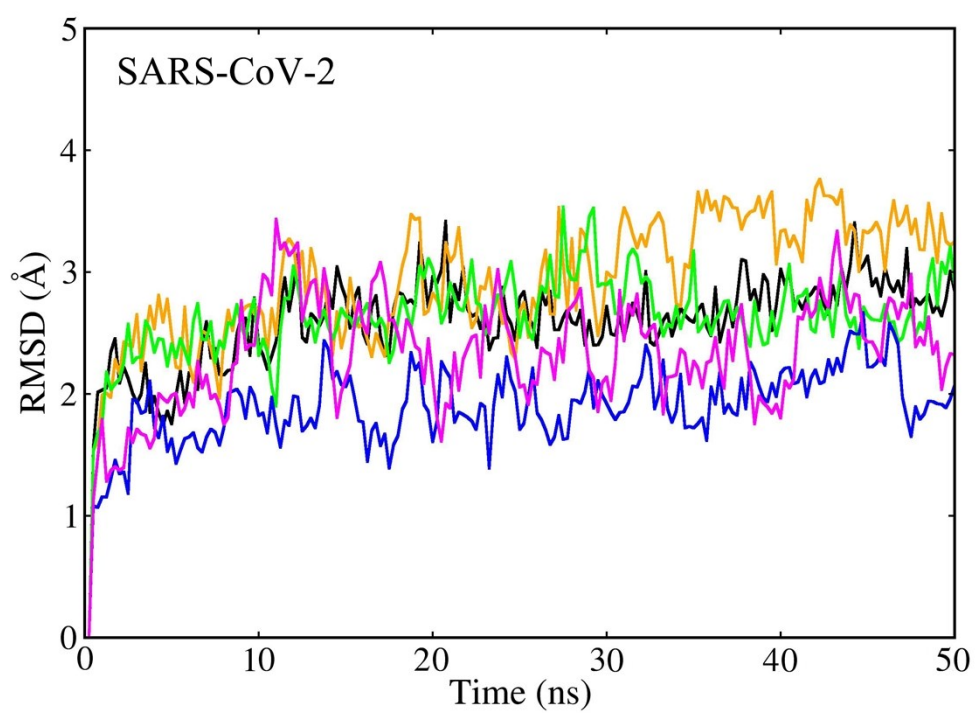

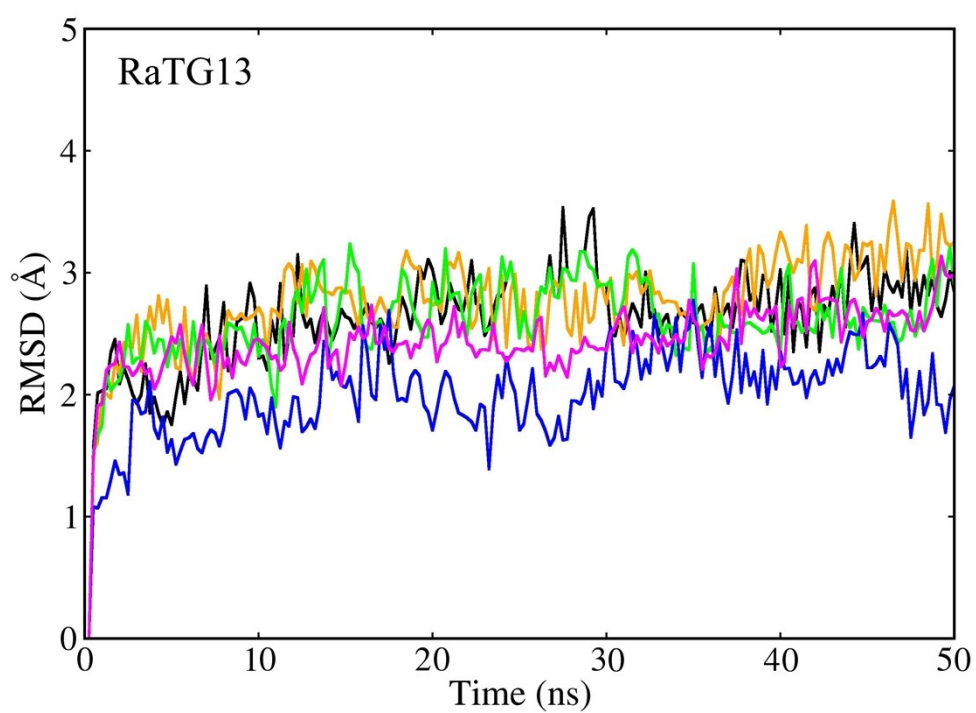

**Figure S2.** RMSDs of SARS-CoV-2, SARS-CoV and RaTG13 systems. For each system, five trajectories were run and their RMSDs of backbone are shown with different colors in the figures.
